# Supplementary material
Source: bioRxiv or medRxiv preprint supplement (https://medrxiv.org/content/medrxiv/early/2021/09/27/2021.09.23.21264018/DC2/embed/media-2.pdf)

**A**

## Genomic Sampling in South Africa

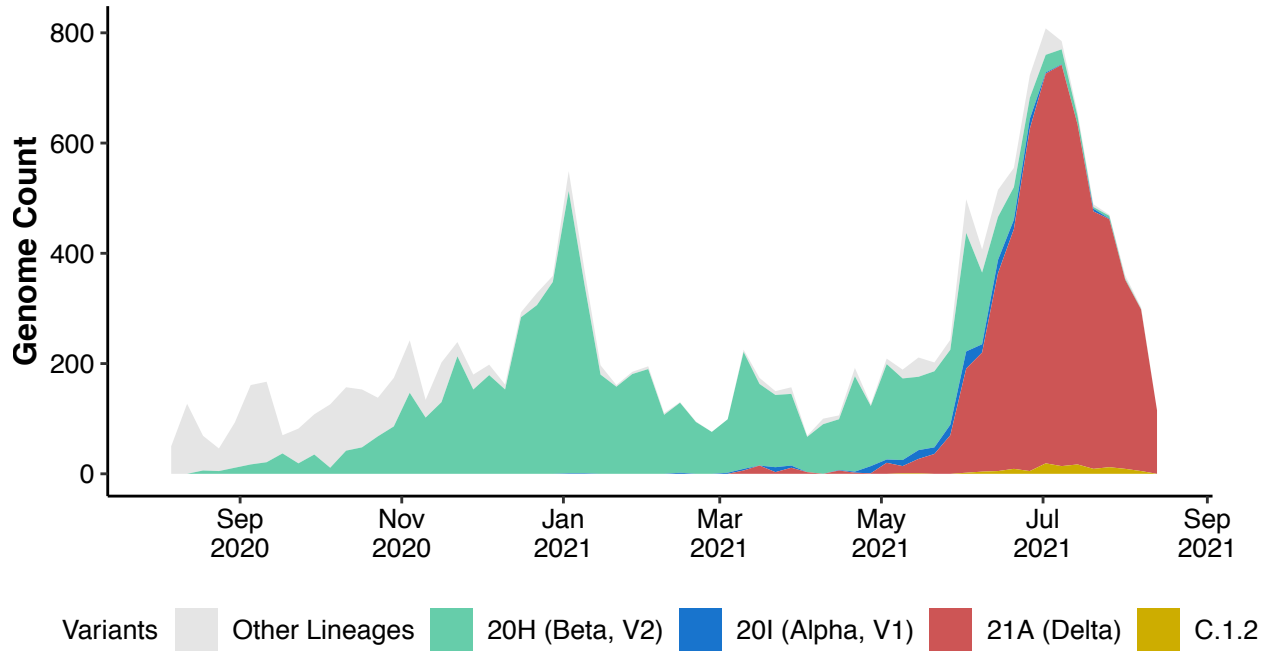**B**

## Delta Lineages in South Africa

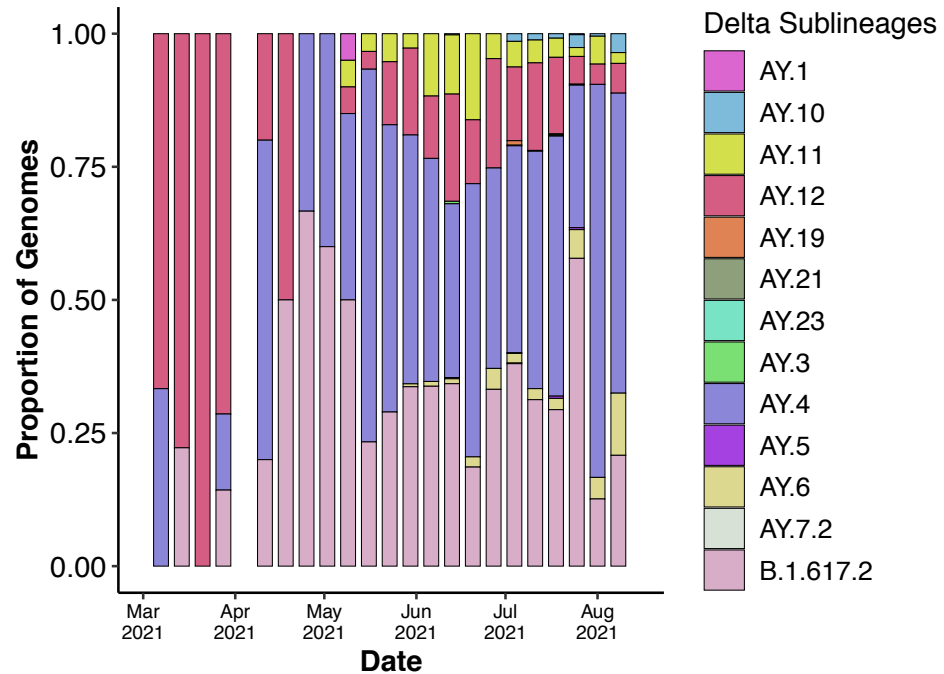

Supplement: Supplementary file [file media-2.pdf]
